# Supplementary material for: Th2 high and mast cell gene signatures are associated with corticosteroid sensitivity in COPD
Source: PubMed Central journal article supplement — Thorax. 2022 Dec 7;78(4):335–43. doi: 10.1136/thorax-2021-217736 (PMC10086461; doi:10.1136/thorax-2021-217736), 2022-12-07
Supplement: thorax-2021-217736supp001.pdf [file thorax-2021-217736supp001.pdf]

## Supplementary

### Cellular deconvolution

In this study, we used AutoGeneS[1] that automatically extracts informative genes and outperforms other methods for analyzing bulk RNA samples with closely correlated cell types and noisy single-cell reference profiles. The number of informative genes was manually set to 300 and 400 genes and we selected the one (n=400) with the most stable results across cohorts. Similarly, the proportions of major cell types--goblet, secretory, and ciliated cells--were consistent using different cell type resolutions.

scRNA-Seq data was used from bronchial biopsies[2]. Due to highly similar gene expression profiles, the scRNA-Seq signatures from the club and the 2 goblet cell clusters were combined to generate a uniform scRNA-Seq signature of secretory cells. The merged scRNA-seq count data was normalized to count per million (CPM) and highly variable (HV) genes (n=5,000) were selected. We used the method implemented in single-cell analysis in Python (SCANPY)[3] for selecting HV genes in which genes are binned by their mean expression and those with the highest variance-to-mean ratio are selected as HV genes in each bin. We then performed AutoGeneS[1] to filter 400 informative genes from the highly variable ones that differentiated the cell types. The informative genes minimized correlation and maximized distance between the clusters in the single-cell reference data. For visualisation, single-cell neighbourhood graph (kNN-graph) was computed on the first 50 principal components using 30 neighbours and low-dimensional uniform manifold approximation and projection

(UMAP) embedding was used. Bulk deconvolution was then conducted on all bulk samples using support vector regression (SVR) method[4] for samples measured by both RNA-Seq and microarray.

## Interaction analysis

The interaction analysis was conducted on TAC signatures and Mast cell signatures using a linear mix effect (LME) model investigating the interaction between time and treatment with patient ID as the random factor.

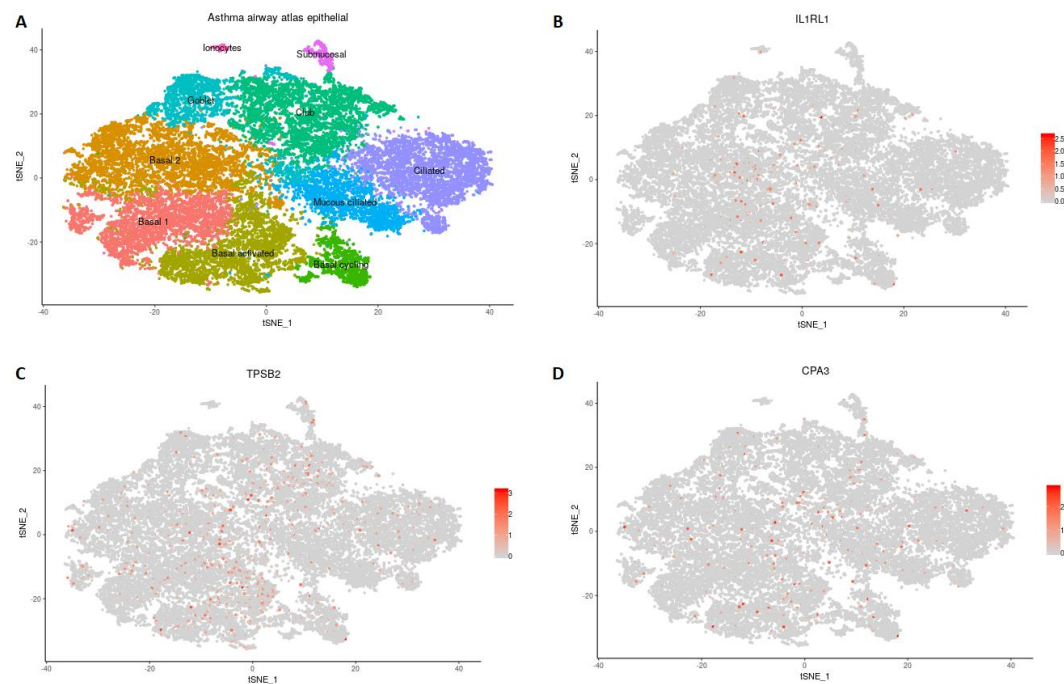

### Figure S1. TSNE plots made from epithelial only cell/subtypes

TSNE plots for ICS sensitive TAC1 genes (IL1RL1, TPSB2 and CPA3), obtained from of single cell seq data obtained from asthmatic (n=4) and healthy controls (n=4) (A-D).

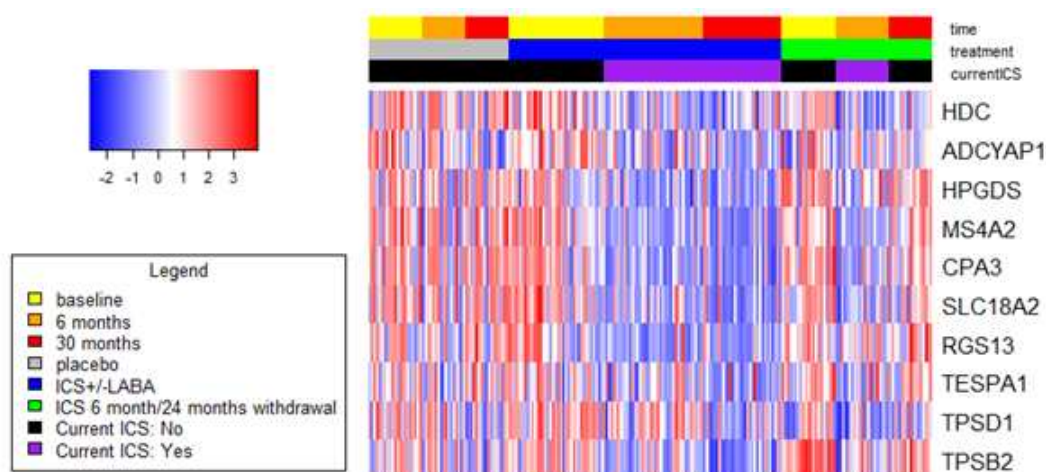

**Figure S2 Individual expression of genes from the mast cells signature.** Heatmap of the genes in the mast cell signature.

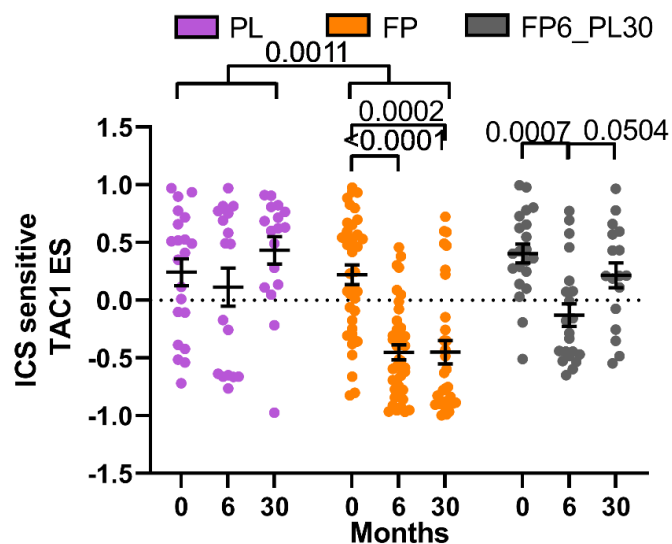

**Figure S3. Relationship between corticosteroid sensitive signature and the influence of inhaled corticosteroid (ICS) treatment** Mean  $\pm$  SEM is presented in the figure. The interaction analysis was conducted on TAC signature using a LME model investigating the interaction between time and treatment with patient ID as the random factor. For two-way anovas a Benjamin Hochberg adjusted pvalue $<0.05$  was considered significant.

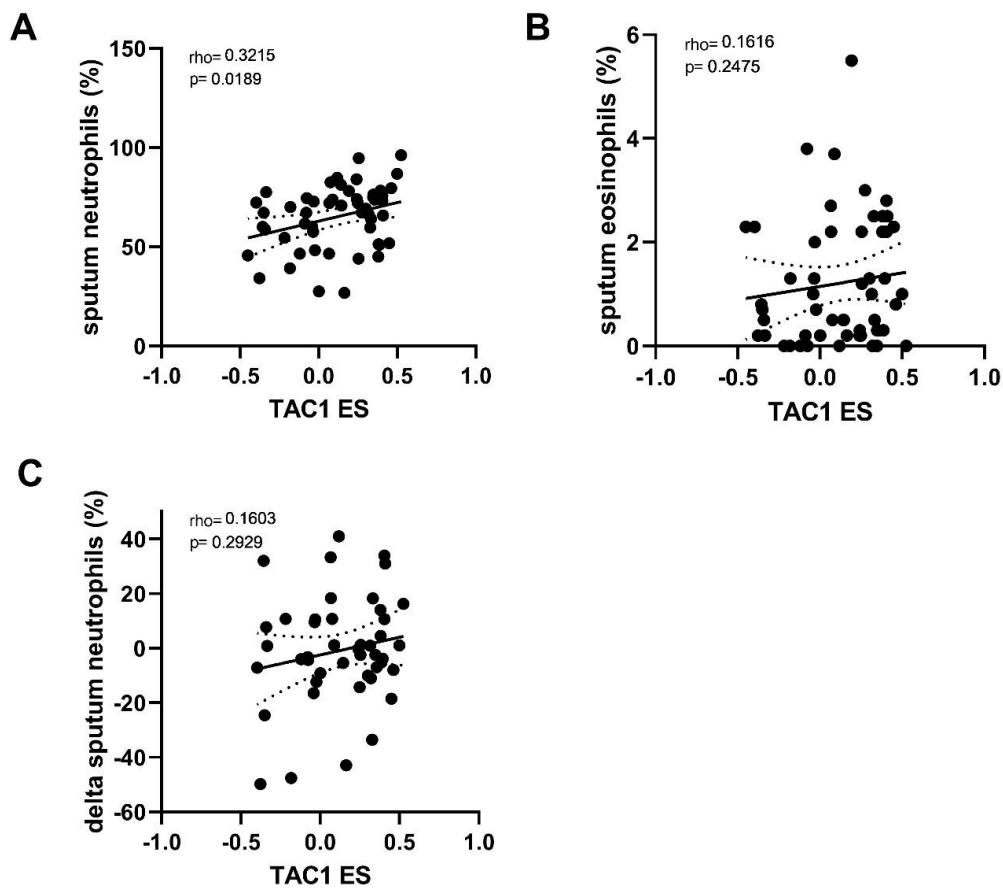

**Figure S4. Percentage of sputum cell correlations with TAC1.** Correlation with TAC1 and baseline A) sputum neutrophils and B) sputum eosinophils and C) delta between 30 months ICS+/-LABA compared to baseline. Spearman correlations were conducted.

**Table S1. Gene set variation analysis (GSVA) datasets**

| Dataset | Reference |
|---------|-----------|
| TAC1    | [5]       |
| TAC2    | [5]       |
| TAC3    | [5]       |

|                                                 |     |
|-------------------------------------------------|-----|
| IL13 IVS array                                  | [6] |
| Inflammasome. Gibson                            | [7] |
| OXPHOS                                          | [8] |
| Lung.brushings,cigarette.irreversibl<br>e.UP.HS | [9] |

**Table S2. GLUCOLD patient characteristics**

|                                                 | Fluticasone±salmeterol for 30 months |           |           | Placebo for 30 months |           |           | Fluticasone for 6 months followed by placebo between 6 and 30 months |          |           |
|-------------------------------------------------|--------------------------------------|-----------|-----------|-----------------------|-----------|-----------|----------------------------------------------------------------------|----------|-----------|
|                                                 | Baseline                             | 6 months  | 30 months | Baseline              | 6 months  | 30 months | Baseline                                                             | 6 months | 30 months |
| Number of included patients                     | 45                                   |           |           | 23                    |           |           | 21                                                                   |          |           |
| Number of biopsies available at each time point | 37                                   | 39        | 31        | 21                    | 17        | 17        | 21                                                                   | 21       | 17        |
| Male/female, n                                  | 41/4                                 |           |           | 19/2                  |           |           | 19/2                                                                 |          |           |
| Age, years                                      | 62.4±7.2                             |           |           | 60.2±7.8              |           |           | 63.1±7.4                                                             |          |           |
| BMI                                             | 25.5±3.7                             |           |           | 24.2±3.9              |           |           | 25.4±3.6                                                             |          |           |
| Current smokers, n (%)                          | 22 (59)                              | 20 (51)   | 14 (45)   | 14 (67)               | 10 (59)   | 8 (47)    | 10 (48)                                                              | 9 (43)   | 8 (47)    |
| RIN score                                       | 3.3±1.5                              | 3.5±1.3   | 4.8±1.5** | 3.5±1.3               | 3.9±1.6   | 5.2±1.8** | 3.3±1.7                                                              | 3.7±1.7  | 3.7±1.5   |
| FEV <sub>1</sub> , %predicted                   | 62.6±9.0                             | 63.6±10.7 | 64.2±12.3 | 61.3±8.80             | 62.3±9.20 | 57.0±8.3  | 64.7±8.62                                                            | 64.9±9.0 | 64.2±12.5 |

**Table S3. Clinical characteristics separated by TAC grouping**

|                               | <b>TAC1</b> | <b>TAC2</b> | <b>TAC3</b> |
|-------------------------------|-------------|-------------|-------------|
| <b>n</b>                      | 26          | 18          | 14          |
| <b>gender male n(%)</b>       | 20(76.9)    | 16(88.9)    | 12(85.7)    |
| <b>current smokers n(%)</b>   | 18(69.2)*   | 4(22.2)*    | 14(100)     |
| <b>age</b>                    | 61(9)*      | 62(7)*      | 55(6)       |
| <b>FEV1pp</b>                 | 62.5(8.4)   | 61.2(10.3)  | 65.3(8.1)   |
| <b>RV/TLCpp</b>               | 127.3(20.7) | 120.5(14.7) | 121.9(16.8) |
| <b>log sputum eos</b>         | 0.52(0.45)  | 0.49(0.4)   | 0.25(0.27)  |
| <b>log sputum neutro</b>      | 2.1(0.4)*   | 2.28(0.4)*  | 1.55(0.45)  |
| <b>log sputum macro</b>       | 1.6(0.4)*   | 1.73(0.36)  | 1.41(0.37)  |
| <b>log sputum lymphocytes</b> | 0.7(0.3)*   | 0.86(0.39)* | 0.37(0.26)  |

\*=p<0.05 compared to TAC3. t-test conducted

**Table S4. Interaction analysis of Time and treatment for TAC signatures and Mast cell signatures**

| <b>Test</b>                         | <b>Beta</b> | <b>Standard Error</b> | <b>P value</b> |
|-------------------------------------|-------------|-----------------------|----------------|
| <b>TAC1 signature</b>               | -0.00550736 | 0.00328515            | 0.0970         |
| <b>TAC2 signature</b>               | -0.00207232 | 0.00379294            | 0.5859         |
| <b>TAC3 signature</b>               | -0.00308084 | 0.00480443            | 0.5226         |
| <b>ICS sensitive TAC1 signature</b> | -0.02409835 | 0.00719126            | 0.0011         |

|                                                  |             |              |        |
|--------------------------------------------------|-------------|--------------|--------|
| <b>Mast cell proportions<br/>(deconvolution)</b> | 0.000037159 | 0.0000315923 | 0.2420 |
| <b>Mast Cell signature (GSVA)</b>                | 0.01518509  | 0.00599422   | 0.0127 |
| <b>Mast cell counts (mm<sup>2</sup>)</b>         | -0.0184948  | 0.00462402   | 0.0001 |



**Table S5. TAC1 differential gene expression analysis comparing bronchial expression profiles of placebo and treatment arms of the GLUCOLD study at baseline, 6 months, and 30 months.**

|         | Baseline |           |           | 6 months |           |           | 30 months |           |           |
|---------|----------|-----------|-----------|----------|-----------|-----------|-----------|-----------|-----------|
|         | logFC    | P Value   | FDR       | logFC    | P Value   | FDR       | logFC     | P Value   | FDR       |
| CPA3    | -0.205   | 4.159E-01 | 9.221E-01 | -1.142   | 2.871E-05 | 4.593E-04 | -1.702    | 3.421E-09 | 5.473E-08 |
| IL1RL1  | -0.036   | 7.815E-01 | 9.221E-01 | -0.384   | 5.495E-03 | 4.396E-02 | -0.749    | 3.050E-07 | 2.440E-06 |
| TARP    | -0.330   | 1.322E-01 | 5.286E-01 | -0.329   | 1.558E-01 | 2.769E-01 | -0.958    | 8.398E-05 | 4.479E-04 |
| TPSB2   | 0.032    | 8.073E-01 | 9.221E-01 | -0.293   | 3.914E-02 | 1.566E-01 | -0.391    | 7.909E-03 | 3.164E-02 |
| ATP2A3  | 0.071    | 6.903E-01 | 9.221E-01 | 0.029    | 8.763E-01 | 8.763E-01 | 0.453     | 2.040E-02 | 6.529E-02 |
| LGALS12 | 0.158    | 6.693E-02 | 5.246E-01 | 0.201    | 2.871E-02 | 1.531E-01 | 0.185     | 5.122E-02 | 1.366E-01 |
| PRSS33  | -0.017   | 8.142E-01 | 9.221E-01 | 0.135    | 8.707E-02 | 2.322E-01 | 0.128     | 1.170E-01 | 2.675E-01 |
| OLIG2   | -0.015   | 8.645E-01 | 9.221E-01 | 0.071    | 4.445E-01 | 5.926E-01 | 0.134     | 1.624E-01 | 3.248E-01 |
| CCR3    | 0.071    | 3.443E-01 | 9.221E-01 | 0.136    | 8.581E-02 | 2.322E-01 | 0.070     | 3.935E-01 | 6.995E-01 |
| ALOX15  | 0.428    | 2.522E-02 | 4.035E-01 | -0.060   | 7.650E-01 | 8.160E-01 | -0.092    | 6.587E-01 | 8.782E-01 |
| FAM101B | -0.056   | 4.705E-01 | 9.221E-01 | 0.058    | 4.846E-01 | 5.965E-01 | 0.042     | 6.185E-01 | 8.782E-01 |
| CD24    | 0.016    | 9.292E-01 | 9.292E-01 | -0.156   | 4.209E-01 | 5.926E-01 | -0.117    | 5.582E-01 | 8.782E-01 |
| CLC     | -0.040   | 6.655E-01 | 9.221E-01 | 0.153    | 1.158E-01 | 2.647E-01 | 0.025     | 8.065E-01 | 9.926E-01 |
| SOCS2   | -0.130   | 9.837E-02 | 5.246E-01 | 0.053    | 5.243E-01 | 5.992E-01 | -0.001    | 9.951E-01 | 9.951E-01 |
| HRH4    | 0.029    | 7.453E-01 | 9.221E-01 | 0.133    | 1.544E-01 | 2.769E-01 | 0.004     | 9.647E-01 | 9.951E-01 |
| VSTM1   | 0.012    | 8.530E-01 | 9.221E-01 | 0.093    | 1.934E-01 | 3.095E-01 | 0.008     | 9.160E-01 | 9.951E-01 |

Abbreviation FC= Fold Change, FDR=False Discovery Rate

## References

1. Aliee H, Theis F. AutoGeneS: Automatic gene selection using multi-objective optimization for RNA-seq deconvolution. *bioRxiv* 2020.
2. Braga FAV, Kar G, Berg M, Carpaij OA, Polanski K, Simon LM, Brouwer S, Gomes T, Hesse L, Jiang J. A cellular census of human lungs identifies novel cell states in health and in asthma. *Nature medicine* 2019; 25(7): 1153-1163.
3. Li J, Yu C, Ma L, Wang J, Guo G. Comparison of Scanpy-based algorithms to remove the batch effect from single-cell RNA-seq data. *Cell Regeneration* 2020; 9(1): 1-8.
4. Newman AM, Steen CB, Liu CL, Gentles AJ, Chaudhuri AA, Scherer F, Khodadoust MS, Esfahani MS, Luca BA, Steiner D. Determining cell type abundance and expression from bulk tissues with digital cytometry. *Nature biotechnology* 2019; 37(7): 773-782.
5. Kuo C-HS, Pavlidis S, Loza M, Baribaud F, Rowe A, Pandis I, Sousa A, Corfield J, Djukanovic R, Lutter R, Sterk PJ, Auffray C, Guo Y, Adcock IM, Chung KF. T-helper cell type 2 (Th2) and non-Th2 molecular phenotypes of asthma using sputum transcriptomics in U-BIOPRED. *European Respiratory Journal* 2017; 49(2): 1602135.
6. Alevy YG, Patel AC, Romero AG, Patel DA, Tucker J, Roswit WT, Miller CA, Heier RF, Byers DE, Brett TJJTJoci. IL-13-induced airway mucus production is attenuated by MAPK13 inhibition. 2012; 122(12): 4555-4568.
7. Simpson JL, Phipps S, Baines KJ, Oreo KM, Gunawardhana L, Gibson PGJERJ. Elevated expression of the NLRP3 inflammasome in neutrophilic asthma. 2014; 43(4): 1067-1076.
8. Liberzon A, Subramanian A, Pinchback R, Thorvaldsdóttir H, Tamayo P, Mesirov JPJB. Molecular signatures database (MSigDB) 3.0. 2011; 27(12): 1739-1740.
9. Spira A, Beane J, Shah V, Liu G, Schembri F, Yang X, Palma J, Brody JS. Effects of cigarette smoke on the human airway epithelial cell transcriptome. *Proceedings of the National Academy of Sciences* 2004; 101(27): 10143-10148.
